# Supplementary material for: Rational design of dual-ion doped cobalt-free Li-rich cathode materials for enhanced cycle stability of lithium-ion pouch cell batteries
Source: Royal Society of Chemistry journal article supplement (doi:10.1039/d4nr01489h), 2024-01-01
Supplement: d4nr01489h1.pdf [file d4nr01489h1.pdf]

## Supplementary information

Rational design of dual-ion doped cobalt-free Li-rich cathode for enhanced cycle stability of lithium-ion pouch cell batteries.

Otavio Augusto Titton Dias<sup>a\*</sup>, Farnaz Azarnia<sup>b\*</sup>, Keerti Rathi<sup>a</sup>, Viktoriya Pakharenko<sup>a</sup>, Vijay K. Tomer<sup>a</sup>, Mohini Sain<sup>a</sup>

<sup>a</sup> Department of Mechanical and Industrial Engineering, University of Toronto, Toronto, Ontario, M5S 3G8 Canada

<sup>b</sup> Centre for Biocomposites and Biomaterials Processing, John H. Daniels Faculty of Architecture, Landscape, and Design, University of Toronto, Toronto, Ontario, M5S 3B3 Canada

\*These authors contributed equally to this work

## Experimental section

### Materials

Nickel acetate tetrahydrate (>99%), manganese acetate tetrahydrate (>99%), lithium acetate dihydrate (reagent grade), citric acid (>99%), N-Methyl-2-pyrrolidone (NMP, >99%), Lithium hexafluorophosphate solution in ethylene carbonate and dimethyl carbonate, 1.0 M LiPF<sub>6</sub> in EC/DMC=50/50 (v/v), ammonium hydroxide solution 28% NH<sub>3</sub> in H<sub>2</sub>O were obtained from Sigma–Aldrich. Additional materials, including conducting carbon (CC, Super C65), polyvinylidene fluoride (PVDF) as the binder, Al foil (cathode current collector), Cu foil (anode current collector), and tabs (Al and Ni), were obtained from MTI (USA). Trilayered (PP/PE/PP) 25 μm thick separator (Celgard 2325) was obtained from Celgard. Pure lithium foil (100 μm) as counter electrode for coin cell was purchased from Nanochemazone.

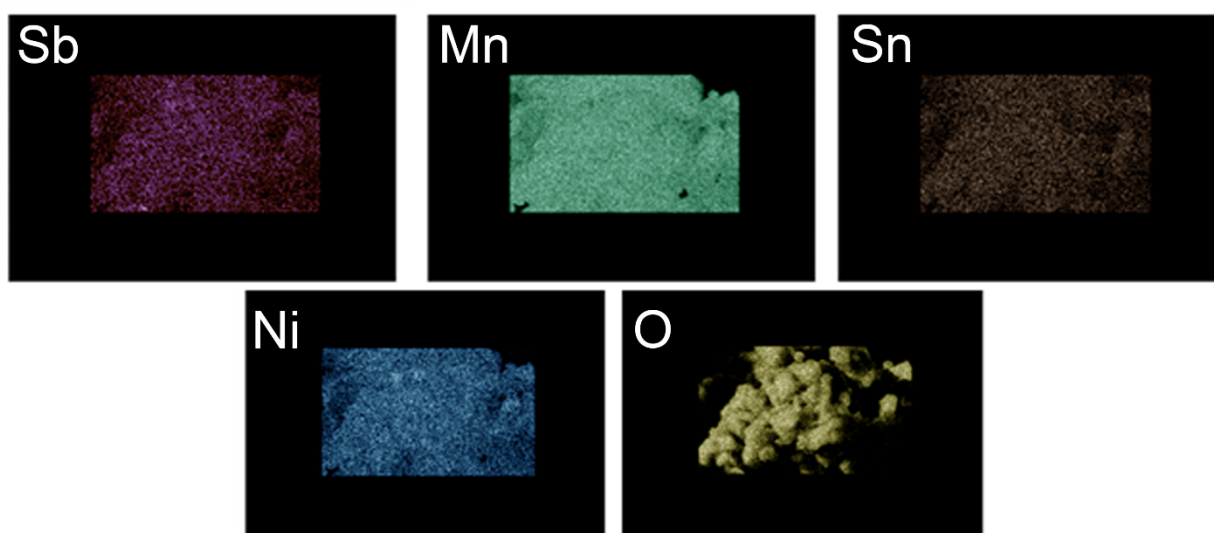

Figure S1. SEM images and EDS mapping of D-LR for Mn, Ni, O, Sb and Sn metals.

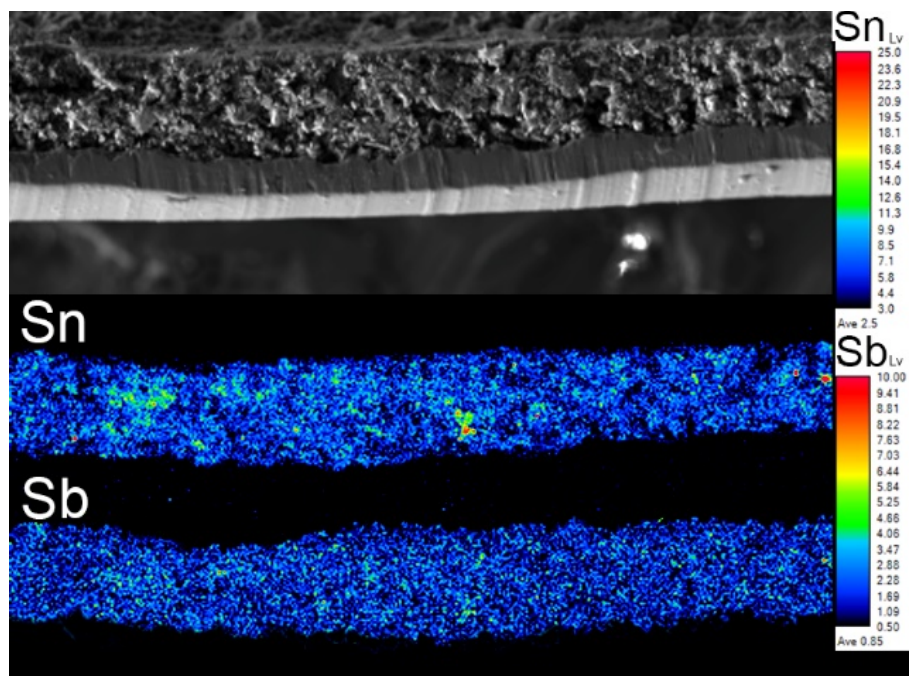

Figure S2. Field-emission electron probe microanalysis (EPMA) of the cross-section of the electrode.

### Equations for thickness for TM slab and Li inter-slab

Equations for thickness of the TM slab ( $S(MO_2)$ ) and the Lithium inter-slab ( $I(LiO_2)$ ) calculation

$$S(MO_2) = 2 \left[ \left( \frac{1}{3} \right) - Z_{ox} \right] \times c \text{ ----- (Equation S1)}$$

$$I(LiO_2) = \frac{c}{3} - S(MO_2) \text{ ----- (Equation S2)}$$

### The Randles–Sevcik equation for Li diffusion calculations

The cyclic voltammetry peak height,  $i_p$ , is directly proportional to the electrolyte concentration,  $C$ , as described by the simplified Randles-Sevcik equation. In this equation,  $n$  is the number of electrons appearing in the half-reaction for the redox couple,  $A$  is the electrode area ( $cm^2$ ),  $D$  is the analytes diffusion coefficient ( $cm^2 s^{-1}$ ) and  $v$  is the rate at which the potential is swept ( $V s^{-1}$ ).  $v$  was measured over a range of scan rates from 0.2 to 1 mV / s.

$$I_p = 2.69 \times 10^5 \times n^{3/2} \times A^{1/2} \times D^{1/2} \times C \times v^{1/2} \text{ -- -- (Equation S3)}$$

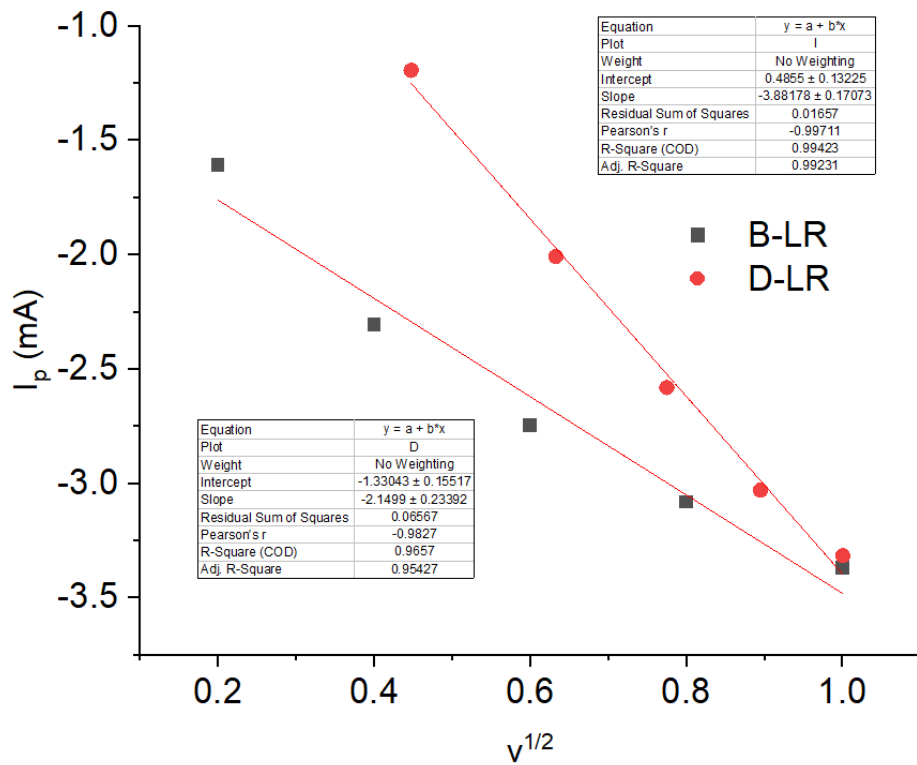

Figure S3. The Randles–Sevcik plots of L-RH and D-RH for total cathodic charge vs scan rate

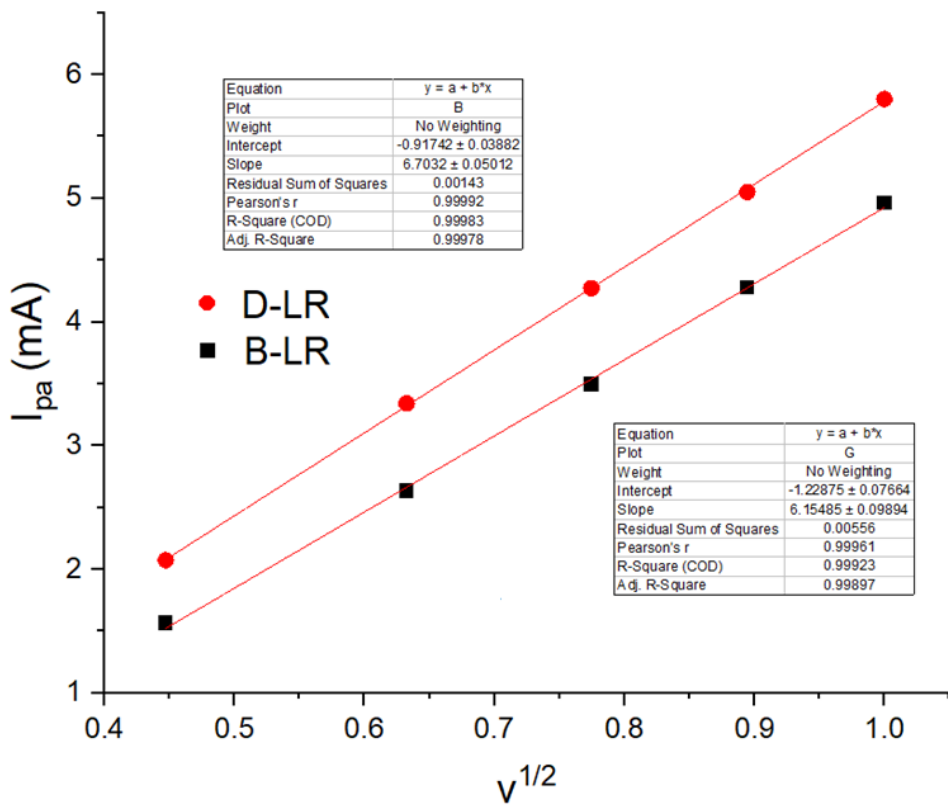

Figure S4. The Randles–Sevcik plots of L-RH and D-RH for total anodic charge vs scan rate

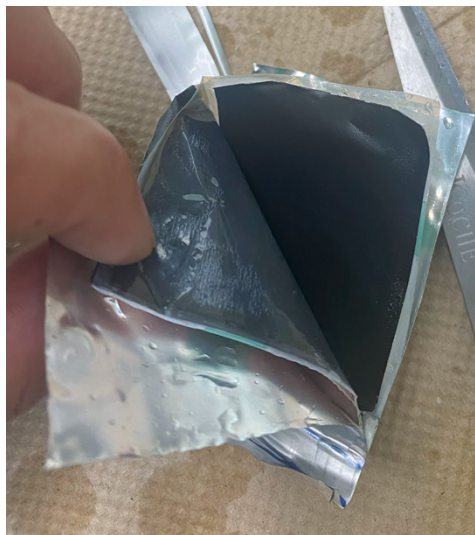

Figure S5. Visual inspection of cathode electrode after 250 cycles
